# Supplementary material for: Tuning of the para-position of pyridyl ligands impacts the electrical properties of a series of Cd(ii) ladder polymers
Source: Royal Society of Chemistry journal article supplement (doi:10.1039/c9dt01846h), 2019-01-01
Supplement: c9dt01846h1.pdf [file c9dt01846h1.pdf]

## Tuning of *para*- position of pyridyl ligands impacts the electrical properties of a series of Cd(II) ladder polymers

Basudeb Dutta,<sup>a</sup> Arka Dey,<sup>b,c</sup> Chittaranjan Sinha,<sup>d</sup> Partha Pratim Ray,<sup>\*b</sup> and Mohammad Hedayetullah Mir<sup>\*a</sup>

<sup>a</sup>Department of Chemistry, Aliah University, New Town, Kolkata 700 156, India.

<sup>b</sup>Department of Physics, Jadavpur University, Jadavpur, Kolkata 700 032, India.

<sup>c</sup>Department of Condensed Matter Physics and Material Sciences, S. N. Bose National Centre for Basic Sciences, Salt Lake, Kolkata 700106, India.

<sup>d</sup>Department of Chemistry, Jadavpur University, Jadavpur, Kolkata 700 032, India.

### Supporting Information

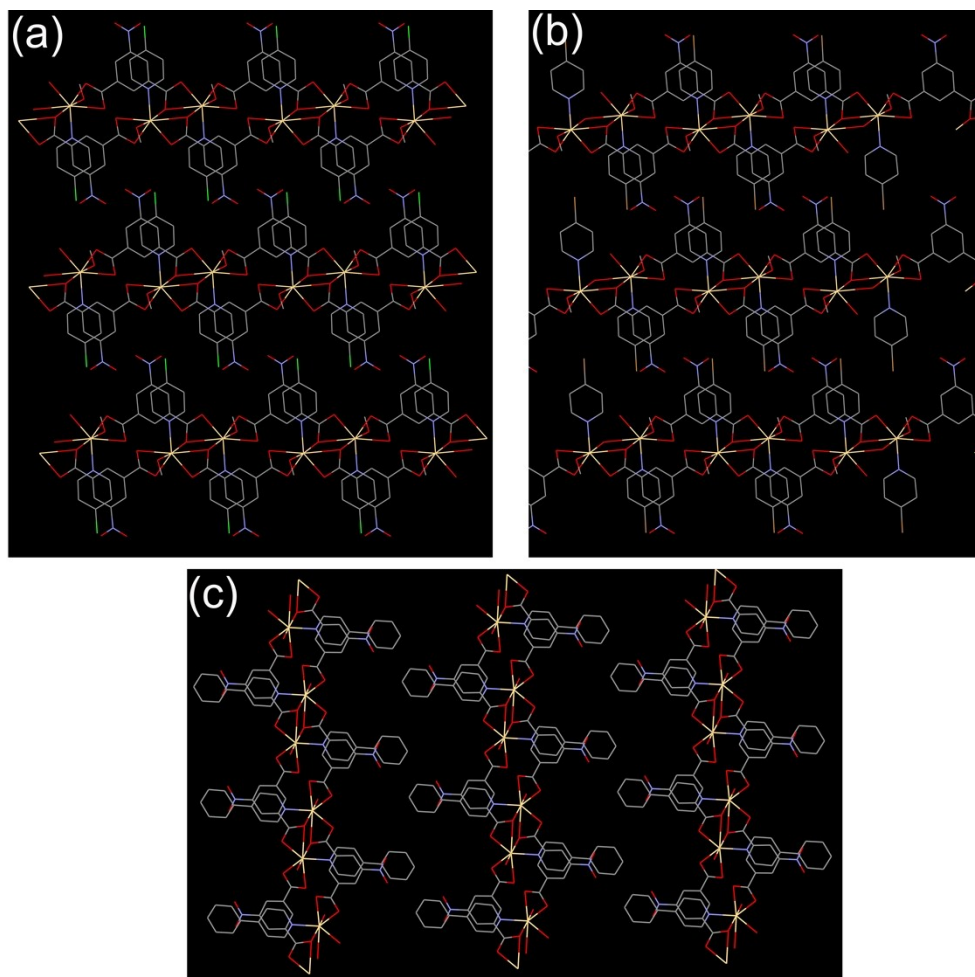

**Fig. S1.** Packing of compound (a) **1**, (b) **2** and (c) **3** along *a*-axis.

**Table S1** Crystal data and refinement parameters for compound **1–3**

| Formula                                                                    | C <sub>14</sub> H <sub>11</sub> CdClN <sub>2</sub> O <sub>7</sub> | C <sub>14</sub> H <sub>11</sub> BrCdN <sub>2</sub> O <sub>7</sub> | C <sub>22</sub> H <sub>18</sub> CdN <sub>3</sub> O <sub>11</sub> |
|----------------------------------------------------------------------------|-------------------------------------------------------------------|-------------------------------------------------------------------|------------------------------------------------------------------|
| fw                                                                         | 467.11                                                            | 511.56                                                            | 612.80                                                           |
| crystalsyst                                                                | triclinic                                                         | triclinic                                                         | triclinic                                                        |
| space group                                                                | <i>P</i> $\bar{1}$                                                | <i>P</i> $\bar{1}$                                                | <i>P</i> $\bar{1}$                                               |
| <i>a</i> (Å)                                                               | 7.8063(3)                                                         | 7.8129(3)                                                         | 7.6232(10)                                                       |
| <i>b</i> (Å)                                                               | 9.7610(4)                                                         | 9.7506(4)                                                         | 9.9666(13)                                                       |
| <i>c</i> (Å)                                                               | 11.7162(5)                                                        | 11.6897(4)                                                        | 16.928(2)                                                        |
| $\alpha$ (deg)                                                             | 83.121(2)                                                         | 83.522(2)                                                         | 89.741(4)                                                        |
| $\beta$ (deg)                                                              | 79.771(2)                                                         | 80.158(2)                                                         | 84.003(4)                                                        |
| $\gamma$ (deg)                                                             | 69.765(2)                                                         | 69.809(2)                                                         | 69.226(3)                                                        |
| <i>V</i> (Å <sup>3</sup> )                                                 | 822.68(6)                                                         | 822.10(6)                                                         | 1195.2(3)                                                        |
| <i>Z</i>                                                                   | 2                                                                 | 2                                                                 | 2                                                                |
| <i>D</i> <sub>calcd</sub> (g/cm <sup>3</sup> )                             | 1.886                                                             | 2.067                                                             | 1.703                                                            |
| $\mu$ (mm <sup>-1</sup> )                                                  | 1.530                                                             | 3.799                                                             | 0.981                                                            |
| $\lambda$ (Å)                                                              | 0.71073                                                           | 0.71073                                                           | 0.71073                                                          |
| data[ <i>I</i> > 2 $\sigma$ ( <i>I</i> )]/params                           | 2872/231                                                          | 2873/231                                                          | 4024/336                                                         |
| GOF on <i>F</i> <sup>2</sup>                                               | 1.009                                                             | 0.802                                                             | 1.183                                                            |
| final <i>R</i> indices[ <i>I</i> > 2 $\sigma$ ( <i>I</i> )] <sup>a,b</sup> | <i>R</i> 1 = 0.0222<br><i>wR</i> 2 = 0.0575                       | <i>R</i> 1 = 0.0366<br><i>wR</i> 2 = 0.1100                       | <i>R</i> 1 = 0.1201<br><i>wR</i> 2 = 0.3090                      |

$$^a R1 = \frac{\sum ||F_o| - |F_c||}{\sum |F_o|}, \quad ^b wR2 = [\frac{\sum w(F_o^2 - F_c^2)^2}{\sum w(F_o^2)^2}]^{1/2}.$$

**Table S2** Selected bond lengths and bond angles in **1**

|                  |            |                |            |
|------------------|------------|----------------|------------|
| Cd01-O1          | 2.260(2)   | Cd01-N1        | 2.316(2)   |
| Cd01-O3_b        | 2.6429(19) | O1-Cd01-O2     | 53.52(7)   |
| Cd01-O2          | 2.5774(19) | O1-Cd01-C7     | 26.54(7)   |
| Cd01-O4_b        | 2.284(2)   | O1-Cd01-O3_c   | 89.23(8)   |
| Cd01-O7          | 2.311(3)   | O2-Cd01-C7     | 26.99(7)   |
| Cd01-O3_c        | 2.388(2)   | O2-Cd01-O3_c   | 94.53(7)   |
| O7-Cd01-O3_b     | 102.57(9)  | N1-Cd01-O3_b   | 84.68(6)   |
| N1-Cd01-C7       | 115.36(7)  | C7-Cd01-O3_b   | 156.72(7)  |
| N1-Cd01-O3_c     | 87.78(8)   | O3_b-Cd01-O4_b | 52.55(7)   |
| C7-Cd01-O3_c     | 92.51(7)   | Cd01-O1-C7     | 99.41(16)  |
| O4_b-Cd01-O3_c   | 100.65(7)  | Cd01-O7-C14    | 128.6(2)   |
| Cd01-N1-C13      | 122.00(19) | Cd01-C7-C1     | 171.61(17) |
| Cd01-C7-O2       | 68.65(14)  | O1-Cd01-N1     | 141.53(7)  |
| O1-Cd01-O7       | 97.03(9)   | O1-Cd01-O4_b   | 86.80(8)   |
| O1-Cd01-O3_b     | 131.39(7)  | O2-Cd01-N1     | 88.52(7)   |
| O2-Cd01-O7       | 86.22(9)   | O2-Cd01-O4_b   | 137.29(7)  |
| O2-Cd01-O3_b     | 168.33(7)  | O7-Cd01-C7     | 91.44(9)   |
| O7-Cd01-N1       | 84.96(8)   | O7-Cd01-O3_c   | 172.68(8)  |
| O7-Cd01-O4_b     | 83.54(9)   | N1-Cd01-O4_b   | 131.39(8)  |
| Cd01-O2-C7       | 84.37(15)  | C7-Cd01-O4_b   | 112.00(7)  |
| Cd01_a-O3-Cd01_c | 104.23(8)  | O3_b-Cd01-O3_c | 75.77(7)   |
| Cd01-N1-C9       | 121.15(19) | Cd01-C7-O1     | 54.05(14)  |

Symmetry Code: b = 1+x, -1+y, z; c = -x, 1-y, 1-z

**Table S3** Selected bond lengths and bond angles in **2**

|                |            |                  |            |
|----------------|------------|------------------|------------|
| Cd01-O1        | 2.263(4)   | C7-Cd01-O6_c     | 92.77(13)  |
| Cd01-O5_b      | 2.285(4)   | O6_b-Cd01-O6_c   | 75.51(12)  |
| Cd01-O2        | 2.569(4)   | Cd01_a-O6-Cd01_c | 104.49(13) |
| Cd01-O6_b      | 2.656(4)   | Cd01-N2-C13      | 121.3(3)   |
| Cd01-O7        | 2.312(5)   | Cd01-C7-O2       | 68.3(3)    |
| Cd01-O6_c      | 2.379(4)   | Cd01-O7-H2M      | 130(7)     |
| Cd01-N2        | 2.307(4)   | O1-Cd01-O7       | 96.72(15)  |
| O1-Cd01-O2     | 53.74(12)  | O1-Cd01-O5_b     | 86.66(13)  |
| O1-Cd01-C7     | 26.73(13)  | O2-Cd01-O7       | 86.46(15)  |
| O1-Cd01-O6_c   | 89.77(13)  | O2-Cd01-O5_b     | 137.62(12) |
| O2-Cd01-C7     | 27.02(12)  | O7-Cd01-N2       | 84.79(15)  |
| O2-Cd01-O6_c   | 94.38(13)  | O7-Cd01-O6_b     | 102.73(14) |
| O7-Cd01-O5_b   | 83.70(15)  | N2-Cd01-O5_b     | 131.30(14) |
| N2-Cd01-C7     | 115.29(13) | C7-Cd01-O5_b     | 112.14(13) |
| O5_b-Cd01-O6_b | 52.22(12)  | O2-Cd01-O6_b     | 168.09(11) |
| Cd01-O1-C7     | 99.0(3)    | O7-Cd01-C7       | 91.36(16)  |
| Cd01-O7-C14    | 128.6(4)   | O7-Cd01-O6_c     | 172.48(14) |
| Cd01-C7-C1     | 171.9(3)   | N2-Cd01-O6_b     | 84.99(12)  |
| O2-Cd01-N2     | 88.38(12)  | C7-Cd01-O6_b     | 156.51(12) |
| O5_b-Cd01-O6_c | 100.52(13) | Cd01-N2-C9       | 121.0(3)   |
| Cd01-O2-C7     | 84.7(3)    | Cd01-C7-O1       | 54.3(2)    |

Symmetry Code: a = -1+x, 1+y, z b = 1+x, -1+y, z; c = 1-x, 2-y, 1-z

**Table S4** Selected bond lengths and bond angles in **3**

|                   |           |                    |           |
|-------------------|-----------|--------------------|-----------|
| Cd(1)-O(5)        | 2.537(11) | O(14)-Cd(1)-O(4)b  | 83.3(5)   |
| Cd(1)-O(3)b       | 2.721(11) | N(4')-Cd(1)-O(4)b  | 133.9(5)  |
| Cd(1)-O(6)        | 2.316(12) | O(3)b-Cd(1)-O(3)c  | 72.1(4)   |
| Cd(1)-O(4)b       | 2.243(12) | Cd(1)-O(5)-C(12)   | 86.9(9)   |
| Cd(1)-O(14)       | 2.307(16) | Cd(1)-N(4')-C(5)   | 120.1(11) |
| Cd(1)-O(3)c       | 2.412(12) | O(5)-Cd(1)-N(4')   | 86.6(4)   |
| Cd(1)-N(4')       | 2.281(14) | O(5)-Cd(1)-O(3)c   | 101.0(4)  |
| O(5)-Cd(1)-O(6)   | 53.9(4)   | O(6)-Cd(1)-O(3)b   | 131.4(4)  |
| O(5)-Cd(1)-O(3)b  | 170.5(4)  | O(14)-Cd(1)-N(4')  | 86.6(6)   |
| O(6)-Cd(1)-O(14)  | 96.8(5)   | O(14)-Cd(1)-O(3)c  | 171.8(5)  |
| O(6)-Cd(1)-O(4)b  | 86.4(4)   | N(4')-Cd(1)-O(3)c  | 88.6(5)   |
| O(14)-Cd(1)-O(3)b | 101.0(5)  | O(4)b-Cd(1)-O(3)c  | 95.3(4)   |
| N(4')-Cd(1)-O(3)b | 86.7(4)   | Cd(1)a-O(3)-Cd(1)c | 107.9(5)  |
| O(3)b-Cd(1)-O(4)b | 51.9(4)   | Cd(1)-O(6)-C(12)   | 97.3(10)  |
| Cd(1)-N(4')-C(1)  | 120.3(11) | O(6)-Cd(1)-O(3)c   | 91.2(4)   |
| O(5)-Cd(1)-O(14)  | 85.3(5)   | O(6)-Cd(1)-N(4')   | 139.6(5)  |
| O(5)-Cd(1)-O(4)b  | 136.8(4)  |                    |           |

Symmetry Code: b = 1+x, -1+y, z; c = 1-x, 1-y, 1-z

**Table S5**  $\pi \cdots \pi$  interaction parameters in **1-3**

|                   | <b>Cg → Cg</b> | <b>Cg-Cg (Å)</b> | <b><math>\pi</math> rings are:</b>                                                         |
|-------------------|----------------|------------------|--------------------------------------------------------------------------------------------|
| <b>Compound 1</b> | Cg1 -> Cg2     | 3.8144(19)       | Cg(1)= N1->C9-> C10 ->C11->C12->C13<br>Cg(2)= C1->C2->C3 ->C4->C5 ->C6                     |
| <b>Compound 2</b> | Cg1 -> Cg2     | 3.815(3)         | Cg(1)= N2-> C9-> C10 -> C11->C12->C13<br>Cg(2)= C1->C2->C3-> C4->C5 ->C6                   |
| <b>Compound 3</b> | Cg(2)-> Cg(4)  | 3.780(10)        | Cg(2)= N4'->C1->C2->C3 ->C4->C5<br>Cg(4)= C(13) -> C(14) -> C(15) -> C(16)-> C(18) ->C(17) |

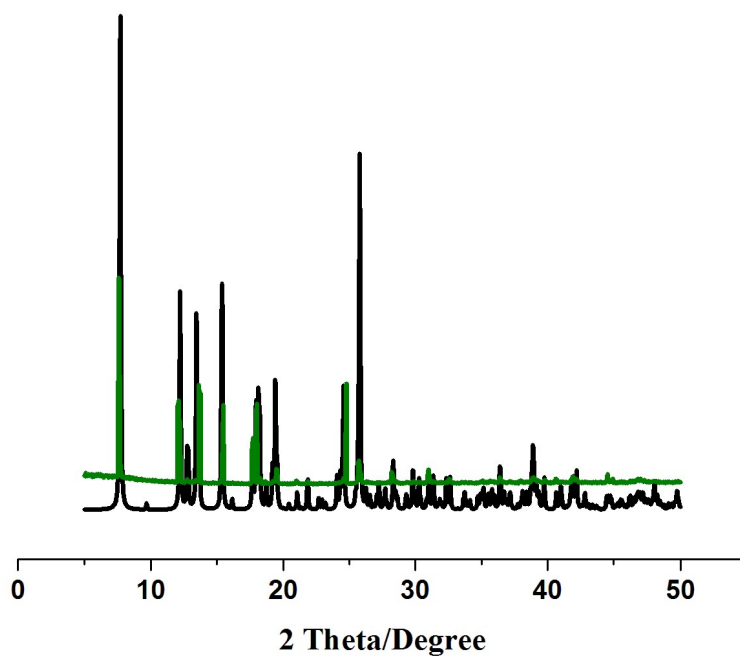**Fig. S1.** PXRD patterns of (a) simulated **1** (black) and (b) as-synthesized **1** (olive).

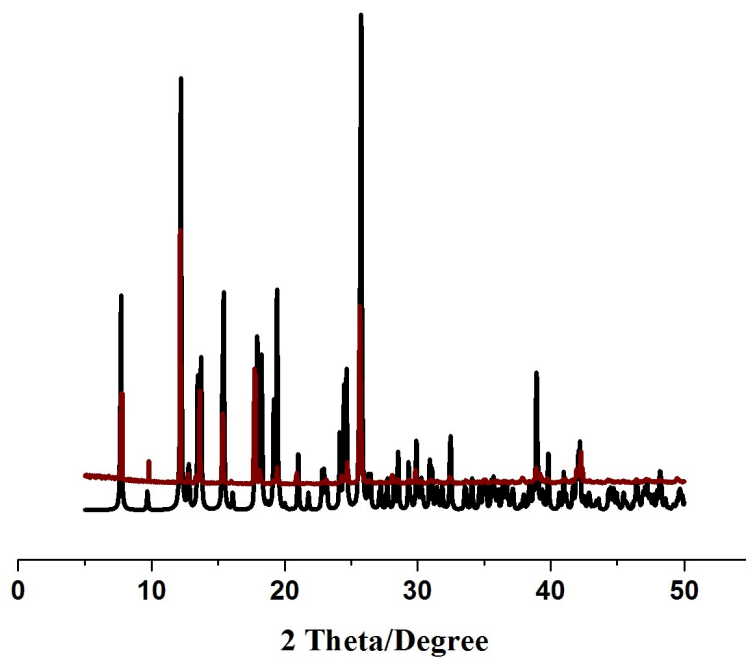

**Fig. S2.** PXRd patterns of (a) simulated **2** (black) and (b) as-synthesized **2** (wine).

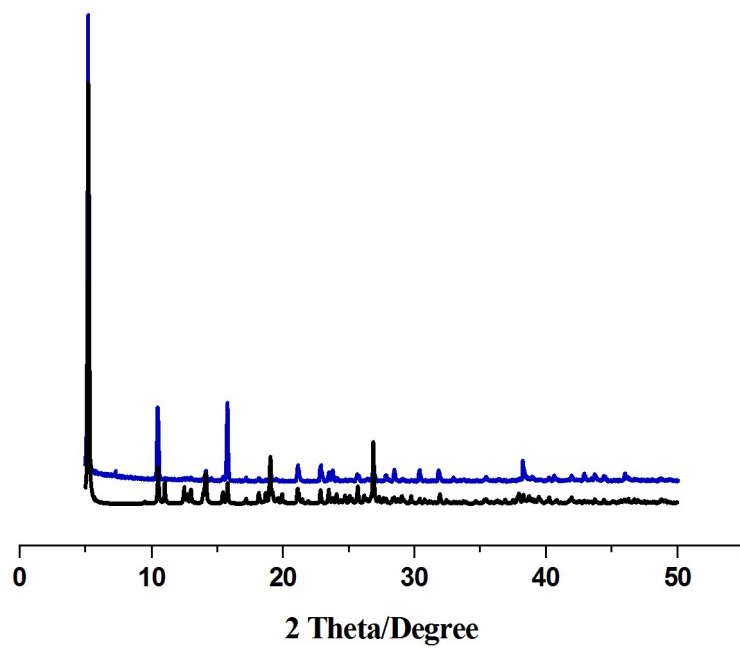

**Fig. S3.** PXRd patterns of (a) simulated **3** (black) and (b) as-synthesized **3** (blue).

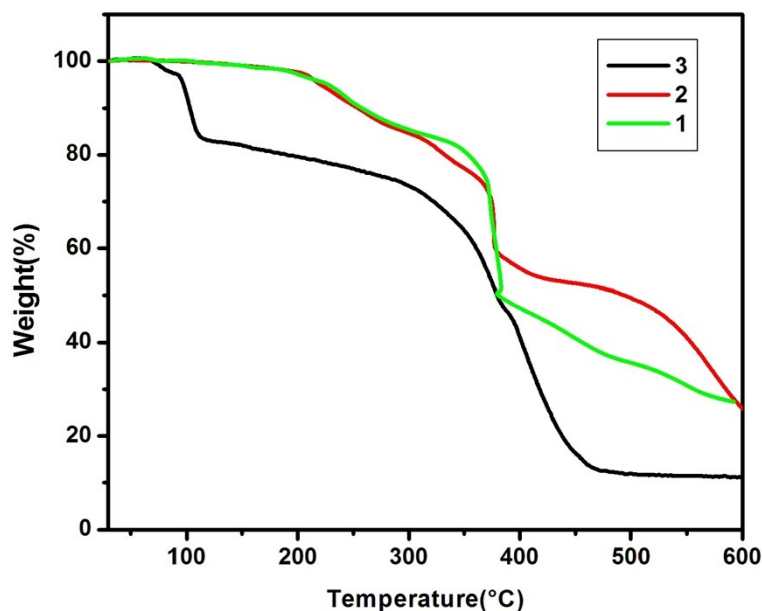

Fig. S4. TGA plots of **1** (green) and **2** (red) and **3** (black).

**Table S5** Comparison of electrical conductivity data of some selected CPs

| Compound                                                                                            | Band Gap | Electrical Conductivity (S m <sup>-1</sup> ) | References |
|-----------------------------------------------------------------------------------------------------|----------|----------------------------------------------|------------|
| [Cd(2,2'-dsb)(4-nvp)(DMF)(H <sub>2</sub> O)]                                                        | 3.28 eV  | $6.60 \times 10^{-4}$                        | 1          |
| [Cd(adc)(4-nvp) <sub>2</sub> (H <sub>2</sub> O)] <sub>n</sub>                                       | 3.33 eV  | $1.83 \times 10^{-3}$                        | 2          |
| [Cd(adc)(4-nvp)-(rectt-4-pncb) <sub>1/2</sub> (H <sub>2</sub> O)] <sub>n</sub>                      | 3.21 eV  | $3.91 \times 10^{-3}$                        | 2          |
| {[Cd(azbpy)(suc)] <sub>2</sub> (H <sub>2</sub> O)} <sub>n</sub>                                     | 2.00     | $3.2 \times 10^{-3}$                         | 3          |
| {[Cd(azbpy)-(msuc)] <sub>2</sub> ·2.5(H <sub>2</sub> O)} <sub>n</sub>                               | 1.90     | $2.64 \times 10^{-3}$                        | 3          |
| {[Cd(azbpy)(mglu)] <sub>2</sub> ·5(H <sub>2</sub> O)} <sub>n</sub>                                  | 1.95     | $1.29 \times 10^{-3}$                        | 3          |
| {[Cd <sub>1.5</sub> (azbpy) <sub>2</sub> (glu)] <sub>2</sub> ·(NO <sub>3</sub> )·MeOH} <sub>n</sub> | 1.92     | $2.07 \times 10^{-3}$                        | 3          |
| [Cd(4-bpd)(SCN) <sub>2</sub> ] <sub>n</sub>                                                         | 2.25     | $2.90 \times 10^{-4}$                        | 4          |
| [Cd(quin) <sub>2</sub> (rectt-4-pncb)] <sub>n</sub>                                                 | 4.08     | $8.84 \times 10^{-6}$                        | 5          |



## References

1. B. Dutta, R. Jana, C. Sinha, P. P. Ray and M. H. Mir, *Inorg. Chem. Front.* 2018, **5**, 1998–2005.
2. B. Dutta, A. Dey, C. Sinha, P. P. Ray and M. H. Mir, *Inorg. Chem.* 2018, **57**, 8029–8032.
3. D. K. Maity, A. Dey, S. Ghosh, A. Halder, P. P. Ray and D. Ghoshal, *Inorg. Chem.* 2018, **57**, 251–263.
4. S. Halder, A. Layek, K. Ghosh, C. Rizzoli, P.P. Ray and P. Roy, *Dalton Trans.*, 2015, **44**, 16149–16155.
5. B. Dutta, A. Dey, C. Sinha, P. P. Ray and M. H. Mir, *Inorg. Chem.* 2019, **58**, 5419–5422.
